# Supplementary material
Source: ML conference proceedings conference paper supplement (https://aclanthology.org/D19-1342)
Supplement: Attachment [file D19-1342.Attachment.zip]

Archive with 1 entries (1 files):
- appendix final.pdf
